# Supplementary material
Source: PubMed Central journal article supplement (PMC3856681)

Figure S1

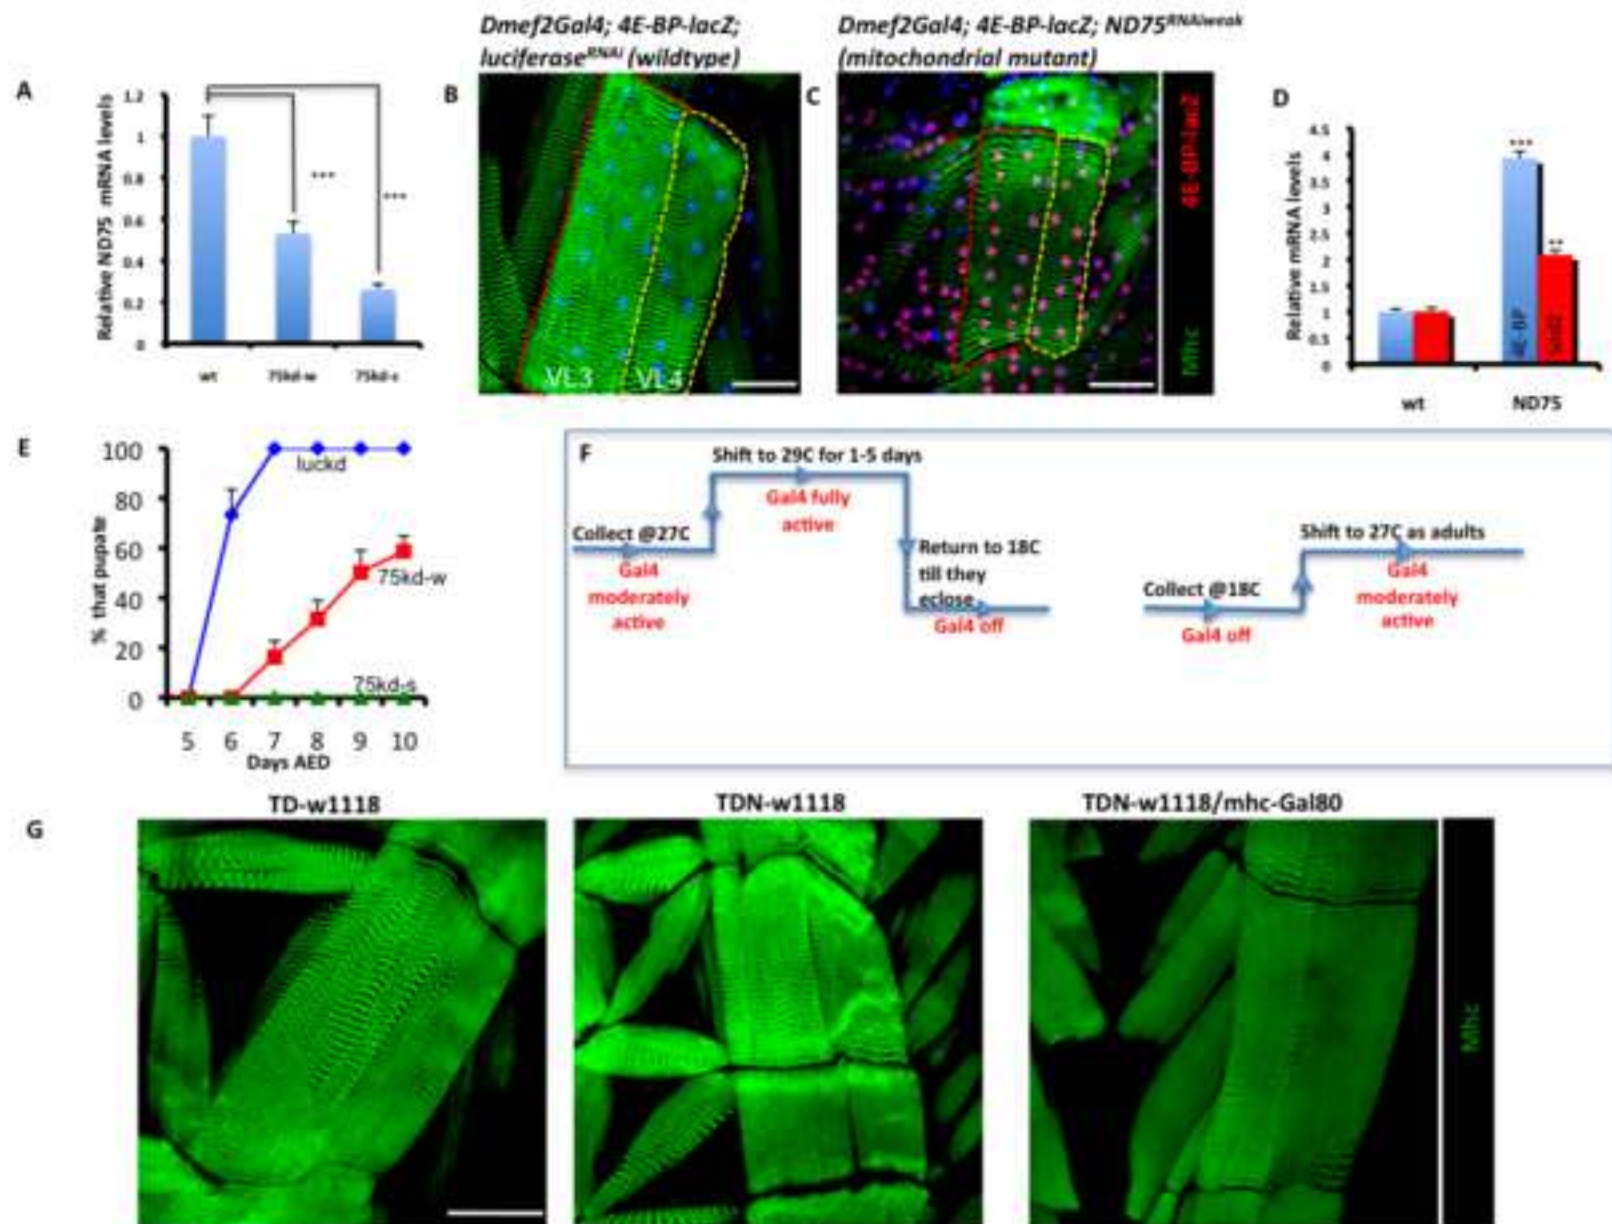

Figure S2

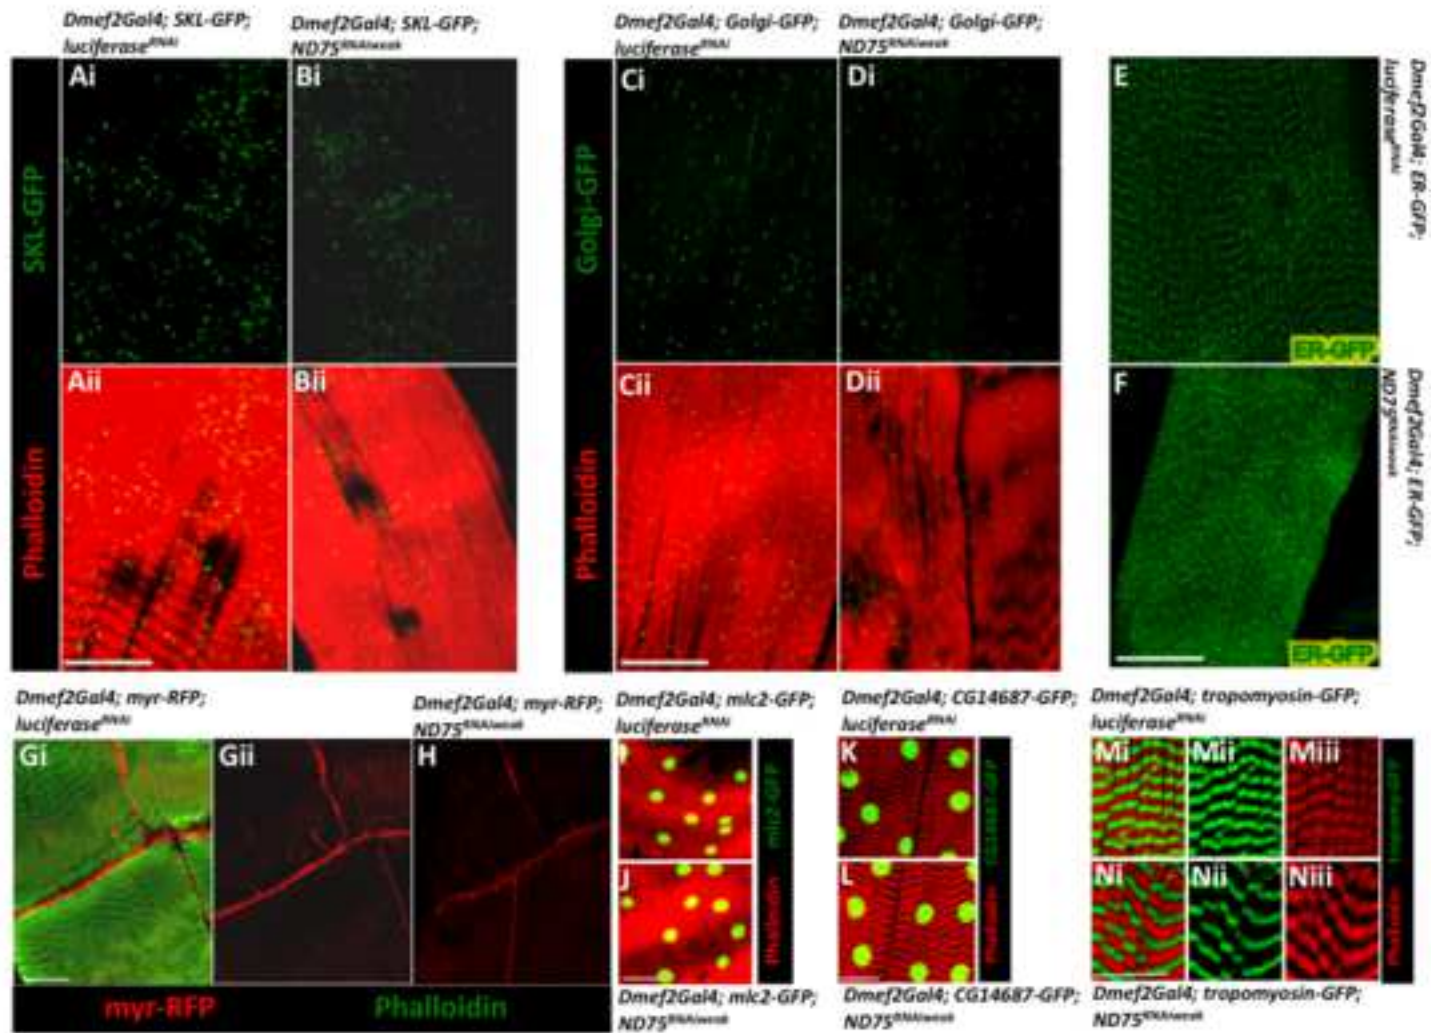

## Figure S3

STEP 1:

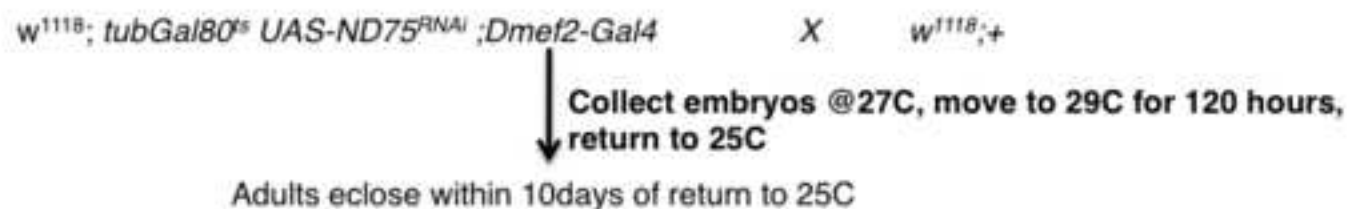

STEP 2:

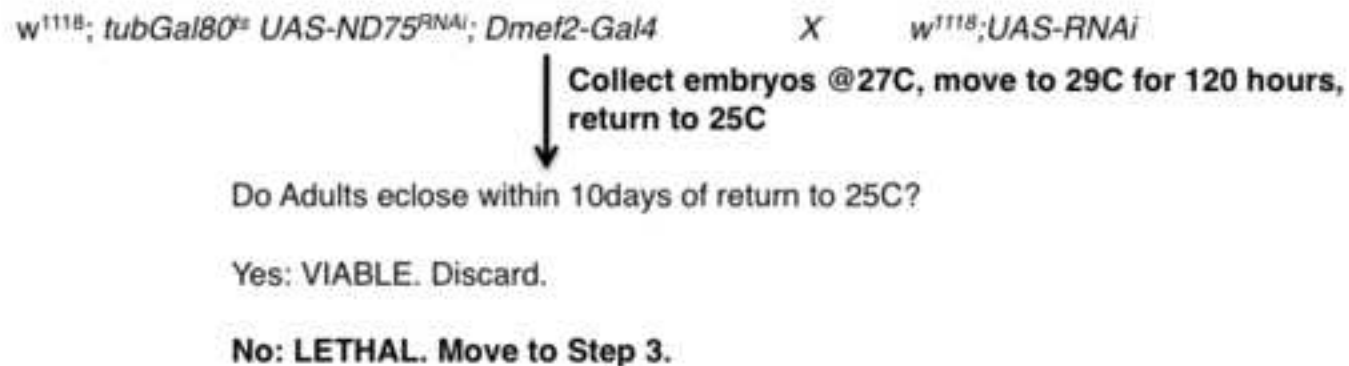

Step 3 cross involves only UAS-RNAi lines from Step 2 that resulted in lethality, hereafter referred to as UAS-RNAi candidate lines

---

STEP 3:

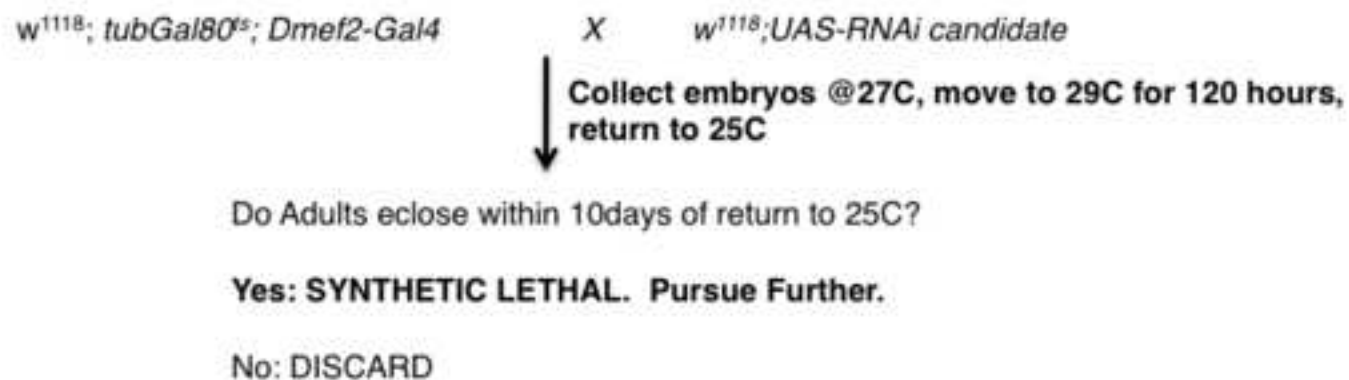

Figure S4

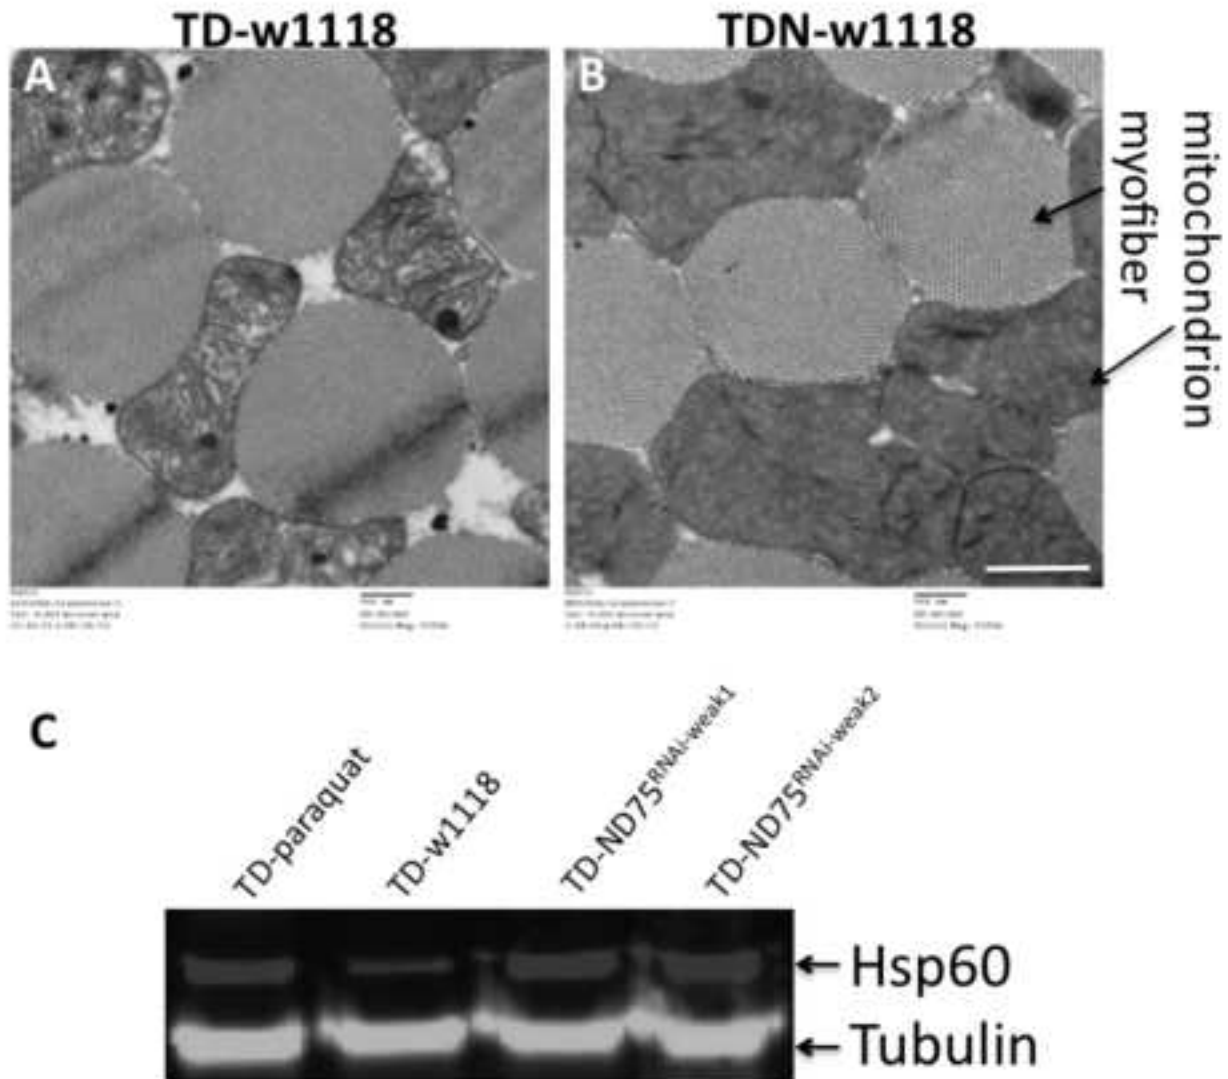

Figure S5

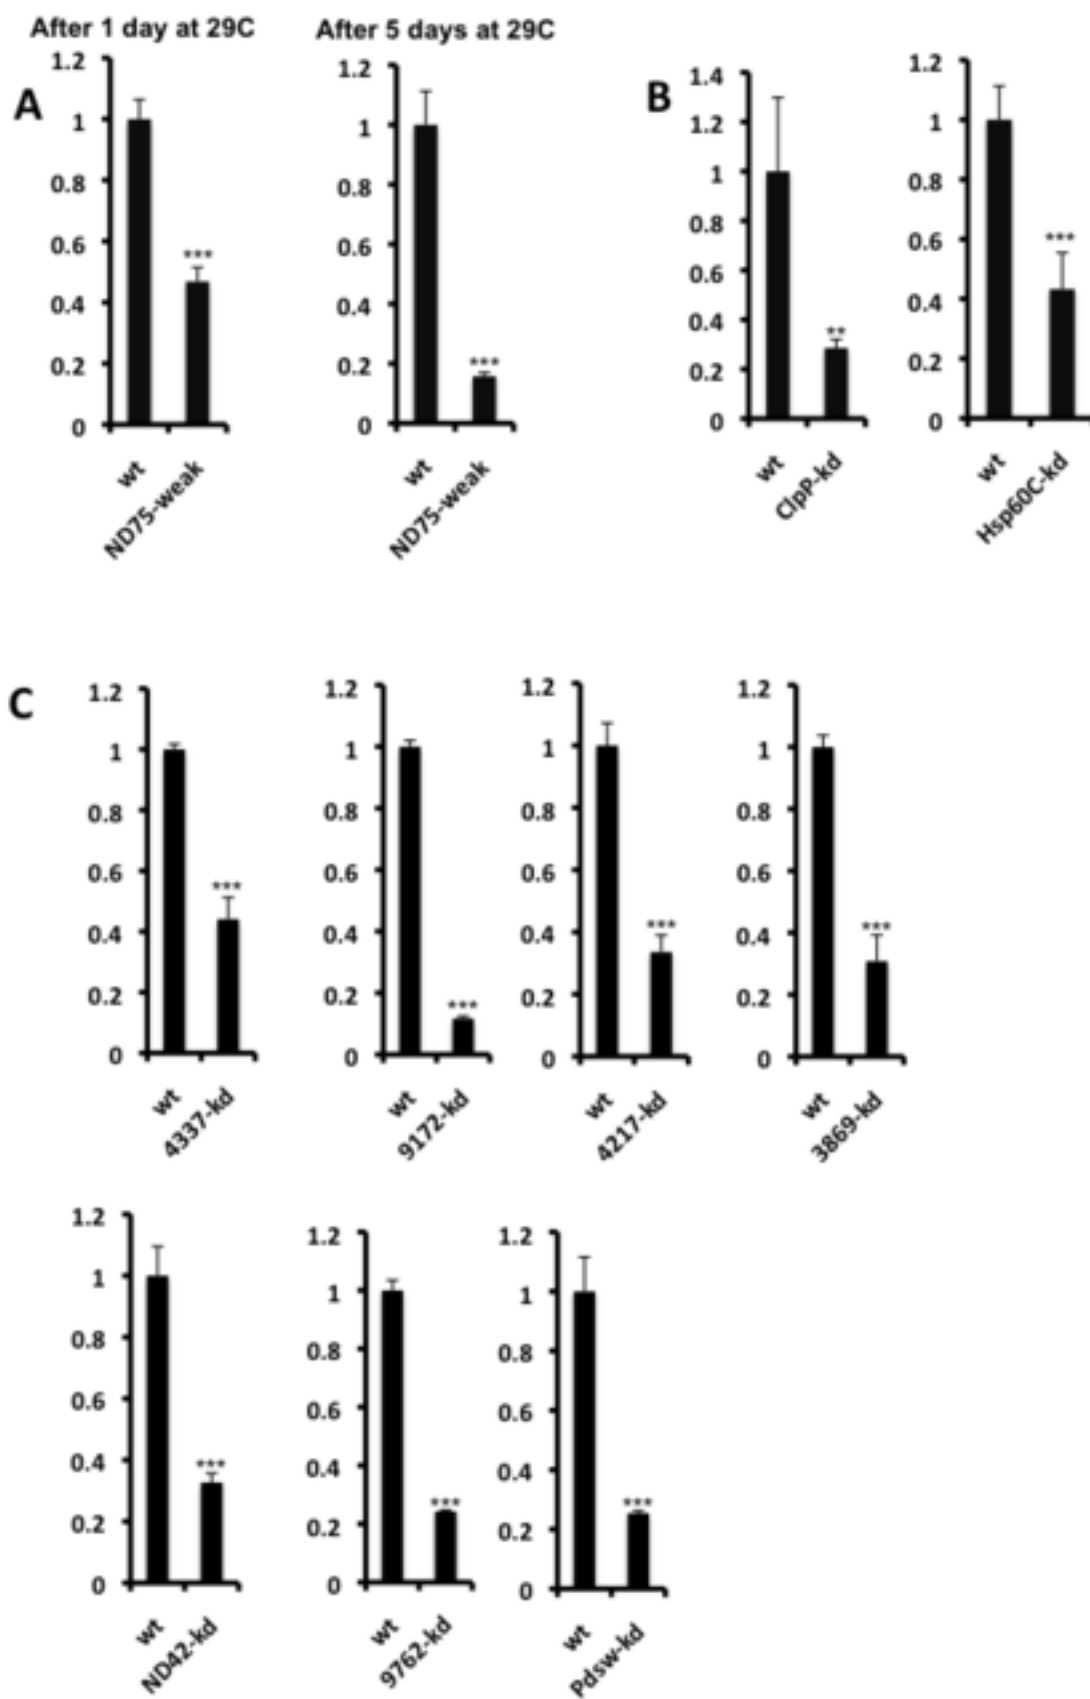

Figure S6

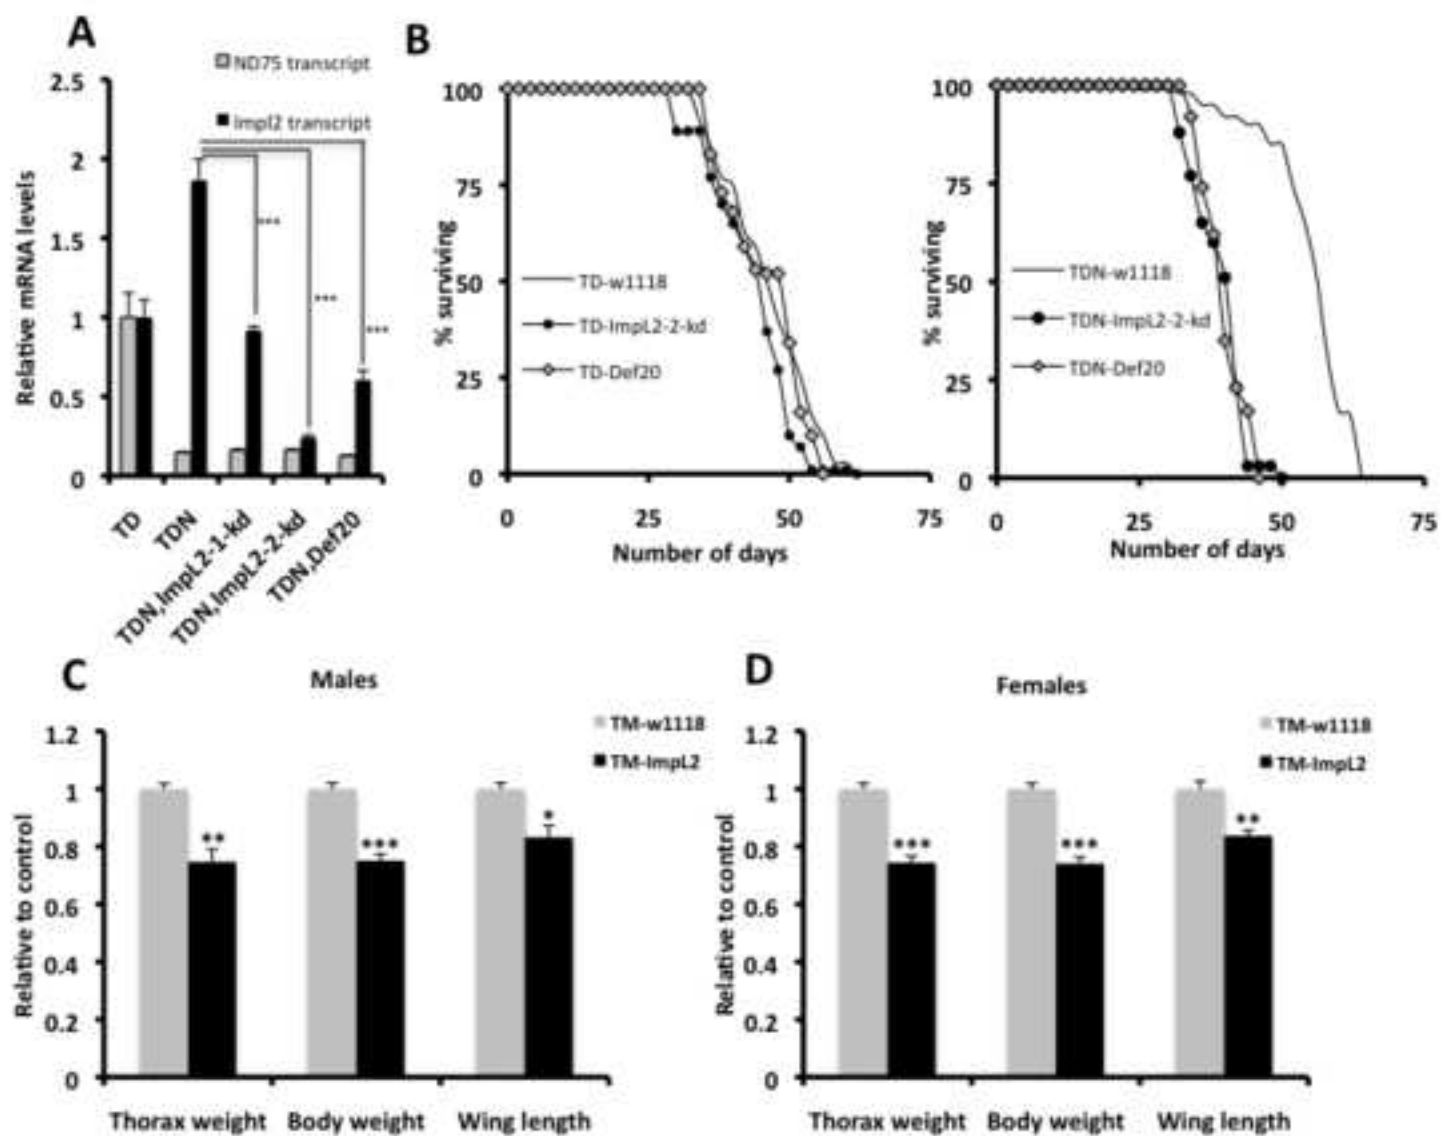

Supplement: NIHMS526665-supplement-02.pdf [file NIHMS526665-supplement-02.pdf]
